# Supplementary material
Source: MDPI journal article supplement (https://www.mdpi.com/2304-6740/9/9/72)

# checkCIF/PLATON report

Structure factors have been supplied for datablock(s) Cj1507

THIS REPORT IS FOR GUIDANCE ONLY. IF USED AS PART OF A REVIEW PROCEDURE FOR PUBLICATION, IT SHOULD NOT REPLACE THE EXPERTISE OF AN EXPERIENCED CRYSTALLOGRAPHIC REFEREE.

No syntax errors found.      CIF dictionary      Interpreting this report

## Datablock: Cj1507

---

|                 |                |                                |
|-----------------|----------------|--------------------------------|
| Bond precision: | C-C = 0.0056 A | Wavelength=1.54184             |
| Cell:           | a=14.0249(5)   | b=17.4283(4)      c=19.1994(7) |
|                 | alpha=90       | beta=103.306(4)      gamma=90  |
| Temperature:    | 123 K          |                                |
|                 | Calculated     | Reported                       |
| Volume          | 4566.9(3)      | 4566.9(3)                      |
| Space group     | P 21/n         | P 21/n                         |
| Hall group      | -P 2yn         | -P 2yn                         |
| Moiety formula  | C53 H77 K N2   | ?                              |
| Sum formula     | C53 H77 K N2   | C106 H154 K2 N4                |
| Mr              | 781.27         | 1562.52                        |
| Dx,g cm-3       | 1.136          | 1.136                          |
| Z               | 4              | 2                              |
| Mu (mm-1)       | 1.275          | 1.275                          |
| F000            | 1712.0         | 1712.0                         |
| F000'           | 1717.41        |                                |
| h,k,lmax        | 16,20,23       | 16,20,23                       |
| Nref            | 8314           | 8295                           |
| Tmin,Tmax       | 0.765,0.847    | 0.639,1.000                    |
| Tmin'           | 0.765          |                                |

Correction method= # Reported T Limits: Tmin=0.639 Tmax=1.000  
AbsCorr = MULTI-SCAN

Data completeness= 0.998      Theta(max)= 67.992

R(reflections)= 0.0991( 5954)      wR2(reflections)= 0.2918( 8295)

S = 1.071      Npar= 507

---

The following ALERTS were generated. Each ALERT has the format  
**test-name\_ALERT\_alert-type\_alert-level.**  
Click on the hyperlinks for more details of the test.

---

### Alert level B

RINTA01\_ALERT\_3\_B The value of Rint is greater than 0.18  
Rint given 0.199  
PLAT020\_ALERT\_3\_B The Value of Rint is Greater Than 0.12 ..... 0.199 Report  
PLAT213\_ALERT\_2\_B Atom C30 has ADP max/min Ratio ..... 4.4 oblate  
PLAT910\_ALERT\_3\_B Missing # of FCF Reflection(s) Below Theta(Min). 13 Note

---

### Alert level C

PLAT084\_ALERT\_3\_C High wR2 Value (i.e. > 0.25) ..... 0.29 Report  
PLAT213\_ALERT\_2\_C Atom C3 has ADP max/min Ratio ..... 3.2 oblate  
PLAT213\_ALERT\_2\_C Atom C4 has ADP max/min Ratio ..... 3.8 oblate  
PLAT213\_ALERT\_2\_C Atom C9 has ADP max/min Ratio ..... 3.9 oblate  
PLAT220\_ALERT\_2\_C NonSolvent Resd 1 C Ueq(max)/Ueq(min) Range 3.2 Ratio  
PLAT241\_ALERT\_2\_C High 'MainMol' Ueq as Compared to Neighbors of K1 Check  
PLAT250\_ALERT\_2\_C Large U3/U1 Ratio for Average U(i,j) Tensor .... 2.6 Note  
PLAT340\_ALERT\_3\_C Low Bond Precision on C-C Bonds ..... 0.00559 Ang.  
PLAT906\_ALERT\_3\_C Large K Value in the Analysis of Variance ..... 5.262 Check  
PLAT911\_ALERT\_3\_C Missing FCF Refl Between Thmin & STh/L= 0.600 6 Report  
PLAT975\_ALERT\_2\_C Check Calcd Resid. Dens. 0.95A From N2 0.41 eA-3

---

### Alert level G

PLAT003\_ALERT\_2\_G Number of Uiso or Uij Restrained non-H Atoms ... 4 Report  
PLAT045\_ALERT\_1\_G Calculated and Reported Z Differ by a Factor ... 2.00 Check  
PLAT186\_ALERT\_4\_G The CIF-Embedded .res File Contains ISOR Records 1 Report  
PLAT303\_ALERT\_2\_G Full Occupancy Atom H4A with # Connections 2.00 Check  
PLAT779\_ALERT\_4\_G Suspect or Irrelevant (Bond) Angle(s) in CIF ... 40.40 Deg.  
K1 -C4 -H4A 1\_555 1\_555 1\_555 ..... # 52 Check  
PLAT793\_ALERT\_4\_G Model has Chirality at C3 (Centro SPGR) S Verify  
PLAT860\_ALERT\_3\_G Number of Least-Squares Restraints ..... 24 Note  
PLAT883\_ALERT\_1\_G No Info/Value for \_atom\_sites\_solution\_primary . Please Do !  
PLAT909\_ALERT\_3\_G Percentage of I>2sig(I) Data at Theta(Max) Still 54% Note  
PLAT941\_ALERT\_3\_G Average HKL Measurement Multiplicity ..... 4.7 Low  
PLAT978\_ALERT\_2\_G Number C-C Bonds with Positive Residual Density. 5 Info

---

0 **ALERT level A** = Most likely a serious problem - resolve or explain  
4 **ALERT level B** = A potentially serious problem, consider carefully  
11 **ALERT level C** = Check. Ensure it is not caused by an omission or oversight  
11 **ALERT level G** = General information/check it is not something unexpected

2 ALERT type 1 CIF construction/syntax error, inconsistent or missing data  
11 ALERT type 2 Indicator that the structure model may be wrong or deficient  
10 ALERT type 3 Indicator that the structure quality may be low  
3 ALERT type 4 Improvement, methodology, query or suggestion  
0 ALERT type 5 Informative message, check

---

---

It is advisable to attempt to resolve as many as possible of the alerts in all categories. Often the minor alerts point to easily fixed oversights, errors and omissions in your CIF or refinement strategy, so attention to these fine details can be worthwhile. In order to resolve some of the more serious problems it may be necessary to carry out additional measurements or structure refinements. However, the purpose of your study may justify the reported deviations and the more serious of these should normally be commented upon in the discussion or experimental section of a paper or in the "special\_details" fields of the CIF. checkCIF was carefully designed to identify outliers and unusual parameters, but every test has its limitations and alerts that are not important in a particular case may appear. Conversely, the absence of alerts does not guarantee there are no aspects of the results needing attention. It is up to the individual to critically assess their own results and, if necessary, seek expert advice.

### **Publication of your CIF in IUCr journals**

A basic structural check has been run on your CIF. These basic checks will be run on all CIFs submitted for publication in IUCr journals (*Acta Crystallographica*, *Journal of Applied Crystallography*, *Journal of Synchrotron Radiation*); however, if you intend to submit to *Acta Crystallographica Section C* or *E* or *IUCrData*, you should make sure that full publication checks are run on the final version of your CIF prior to submission.

### **Publication of your CIF in other journals**

Please refer to the *Notes for Authors* of the relevant journal for any special instructions relating to CIF submission.

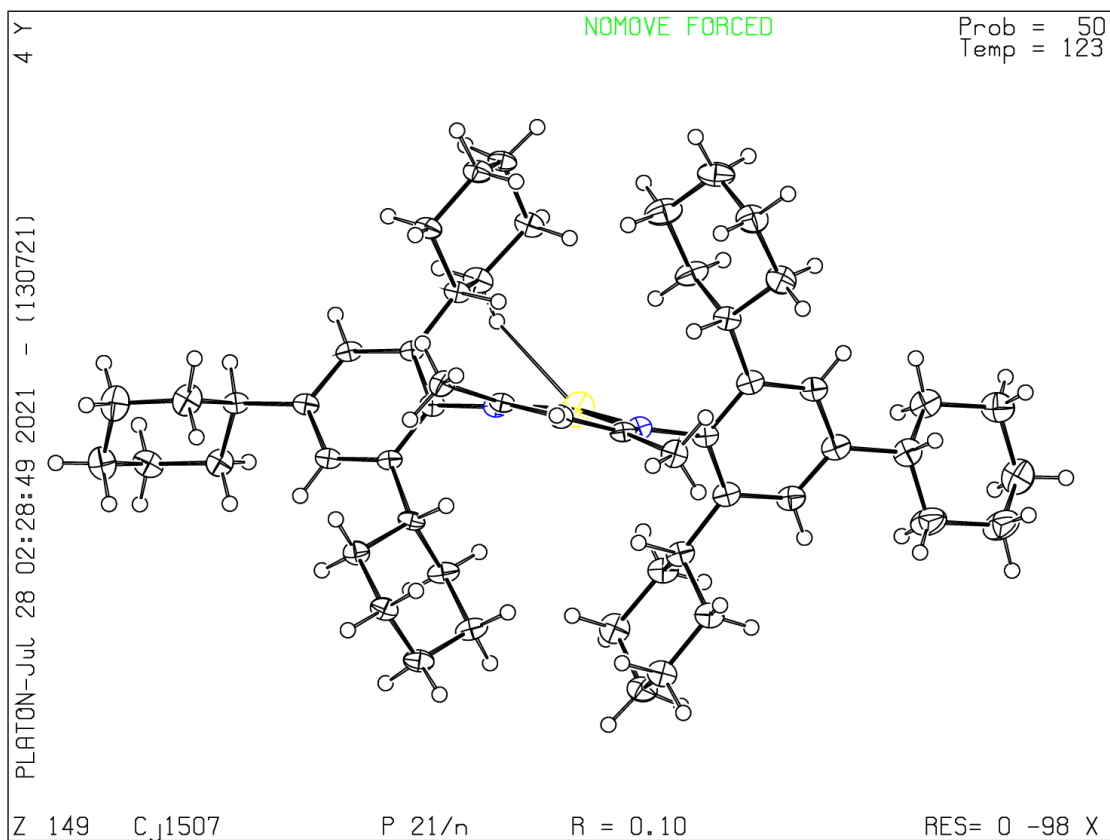

Supplement: s1 [file s1 › cmpd6 checkcif.pdf]
