# Supplementary material
Source: MDPI journal article supplement (https://www.mdpi.com/2304-6740/9/9/72)

# checkCIF/PLATON report

Structure factors have been supplied for datablock(s) Cj1504

THIS REPORT IS FOR GUIDANCE ONLY. IF USED AS PART OF A REVIEW PROCEDURE FOR PUBLICATION, IT SHOULD NOT REPLACE THE EXPERTISE OF AN EXPERIENCED CRYSTALLOGRAPHIC REFEREE.

No syntax errors found.      CIF dictionary      Interpreting this report

## Datablock: Cj1504

---

|                 |                |                    |               |
|-----------------|----------------|--------------------|---------------|
| Bond precision: | C-C = 0.0042 Å | Wavelength=1.54184 |               |
| Cell:           | a=11.8341(10)  | b=16.6685(19)      | c=18.3950(15) |
|                 | alpha=90       | beta=90            | gamma=90      |
| Temperature:    | 123 K          |                    |               |
|                 | Calculated     | Reported           |               |
| Volume          | 3628.5(6)      | 3628.5(6)          |               |
| Space group     | P n m a        | P n m a            |               |
| Hall group      | -P 2ac 2n      | -P 2ac 2n          |               |
| Moiety formula  | C41 H59 K N2   | ?                  |               |
| Sum formula     | C41 H59 K N2   | C41 H59 K N2       |               |
| Mr              | 619.00         | 619.00             |               |
| Dx,g cm-3       | 1.133          | 1.133              |               |
| Z               | 4              | 4                  |               |
| Mu (mm-1)       | 1.485          | 1.485              |               |
| F000            | 1352.0         | 1352.0             |               |
| F000'           | 1356.59        |                    |               |
| h,k,lmax        | 14,20,22       | 14,20,22           |               |
| Nref            | 3501           | 3489               |               |
| Tmin,Tmax       | 0.948,0.956    | 0.832,1.000        |               |
| Tmin'           | 0.849          |                    |               |

Correction method= # Reported T Limits: Tmin=0.832 Tmax=1.000  
AbsCorr = MULTI-SCAN

Data completeness= 0.997      Theta(max)= 68.993

R(reflections)= 0.0638( 2663)      wR2(reflections)= 0.1731( 3489)

S = 1.100      Npar= 328

---

The following ALERTS were generated. Each ALERT has the format  
**test-name\_ALERT\_alert-type\_alert-level.**  
Click on the hyperlinks for more details of the test.

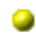

### Alert level C

|                   |                                                  |         |        |
|-------------------|--------------------------------------------------|---------|--------|
| PLAT220_ALERT_2_C | NonSolvent Resd 1 C Ueq(max)/Ueq(min) Range      | 3.1     | Ratio  |
| PLAT340_ALERT_3_C | Low Bond Precision on C-C Bonds .....            | 0.00423 | Ang.   |
| PLAT906_ALERT_3_C | Large K Value in the Analysis of Variance .....  | 5.670   | Check  |
| PLAT910_ALERT_3_C | Missing # of FCF Reflection(s) Below Theta(Min). | 6       | Note   |
| PLAT911_ALERT_3_C | Missing FCF Refl Between Thmin & STh/L= 0.600    | 4       | Report |

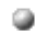

### Alert level G

|                   |                                                  |        |        |
|-------------------|--------------------------------------------------|--------|--------|
| PLAT002_ALERT_2_G | Number of Distance or Angle Restraints on AtSite | 9      | Note   |
| PLAT003_ALERT_2_G | Number of Uiso or Uij Restrained non-H Atoms ... | 4      | Report |
| PLAT172_ALERT_4_G | The CIF-Embedded .res File Contains DFIX Records | 6      | Report |
| PLAT186_ALERT_4_G | The CIF-Embedded .res File Contains ISOR Records | 1      | Report |
| PLAT230_ALERT_2_G | Hirshfeld Test Diff for C2 --C3B .               | 8.5    | s.u.   |
| PLAT300_ALERT_4_G | Atom Site Occupancy of C12 Constrained at        | 0.5    | Check  |
| PLAT300_ALERT_4_G | Atom Site Occupancy of C13 Constrained at        | 0.5    | Check  |
| PLAT300_ALERT_4_G | Atom Site Occupancy of C14 Constrained at        | 0.5    | Check  |
| PLAT300_ALERT_4_G | Atom Site Occupancy of C15 Constrained at        | 0.5    | Check  |
| PLAT300_ALERT_4_G | Atom Site Occupancy of C16 Constrained at        | 0.5    | Check  |
| PLAT300_ALERT_4_G | Atom Site Occupancy of H11 Constrained at        | 0.5    | Check  |
| PLAT300_ALERT_4_G | Atom Site Occupancy of H12A Constrained at       | 0.5    | Check  |
| PLAT300_ALERT_4_G | Atom Site Occupancy of H12B Constrained at       | 0.5    | Check  |
| PLAT300_ALERT_4_G | Atom Site Occupancy of H13A Constrained at       | 0.5    | Check  |
| PLAT300_ALERT_4_G | Atom Site Occupancy of H13B Constrained at       | 0.5    | Check  |
| PLAT300_ALERT_4_G | Atom Site Occupancy of H14A Constrained at       | 0.5    | Check  |
| PLAT300_ALERT_4_G | Atom Site Occupancy of H14B Constrained at       | 0.5    | Check  |
| PLAT300_ALERT_4_G | Atom Site Occupancy of H15A Constrained at       | 0.5    | Check  |
| PLAT300_ALERT_4_G | Atom Site Occupancy of H15B Constrained at       | 0.5    | Check  |
| PLAT300_ALERT_4_G | Atom Site Occupancy of H16A Constrained at       | 0.5    | Check  |
| PLAT300_ALERT_4_G | Atom Site Occupancy of H16B Constrained at       | 0.5    | Check  |
| PLAT300_ALERT_4_G | Atom Site Occupancy of H18B Constrained at       | 0.5    | Check  |
| PLAT300_ALERT_4_G | Atom Site Occupancy of H18C Constrained at       | 0.5    | Check  |
| PLAT300_ALERT_4_G | Atom Site Occupancy of H21B Constrained at       | 0.5    | Check  |
| PLAT300_ALERT_4_G | Atom Site Occupancy of H21C Constrained at       | 0.5    | Check  |
| PLAT301_ALERT_3_G | Main Residue Disorder .....(Resd 1 )             | 52%    | Note   |
| PLAT367_ALERT_2_G | Long? C(sp?)-C(sp?) Bond C10 - C11 .             | 1.52   | Ang.   |
| PLAT367_ALERT_2_G | Long? C(sp?)-C(sp?) Bond C17 - C18 .             | 1.52   | Ang.   |
| PLAT367_ALERT_2_G | Long? C(sp?)-C(sp?) Bond C20 - C21 .             | 1.52   | Ang.   |
| PLAT720_ALERT_4_G | Number of Unusual/Non-Standard Labels .....      | 20     | Note   |
| PLAT764_ALERT_4_G | Overcomplete CIF Bond List Detected (Rep/Expd) . | 1.11   | Ratio  |
| PLAT789_ALERT_4_G | Atoms with Negative _atom_site_disorder_group #  | 16     | Check  |
| PLAT811_ALERT_5_G | No ADDSYM Analysis: Too Many Excluded Atoms .... | !      | Info   |
| PLAT860_ALERT_3_G | Number of Least-Squares Restraints .....         | 30     | Note   |
| PLAT883_ALERT_1_G | No Info/Value for _atom_sites_solution_primary . | Please | Do !   |
| PLAT912_ALERT_4_G | Missing # of FCF Reflections Above STh/L= 0.600  | 2      | Note   |
| PLAT933_ALERT_2_G | Number of OMIT Records in Embedded .res File ... | 2      | Note   |
| PLAT941_ALERT_3_G | Average HKL Measurement Multiplicity .....       | 4.7    | Low    |
| PLAT965_ALERT_2_G | The SHELXL WEIGHT Optimisation has not Converged | Please | Check  |
| PLAT978_ALERT_2_G | Number C-C Bonds with Positive Residual Density. | 5      | Info   |

- 0 **ALERT level A** = Most likely a serious problem - resolve or explain  
0 **ALERT level B** = A potentially serious problem, consider carefully  
5 **ALERT level C** = Check. Ensure it is not caused by an omission or oversight  
40 **ALERT level G** = General information/check it is not something unexpected
- 1 ALERT type 1 CIF construction/syntax error, inconsistent or missing data  
10 ALERT type 2 Indicator that the structure model may be wrong or deficient  
7 ALERT type 3 Indicator that the structure quality may be low  
26 ALERT type 4 Improvement, methodology, query or suggestion  
1 ALERT type 5 Informative message, check

---

---

It is advisable to attempt to resolve as many as possible of the alerts in all categories. Often the minor alerts point to easily fixed oversights, errors and omissions in your CIF or refinement strategy, so attention to these fine details can be worthwhile. In order to resolve some of the more serious problems it may be necessary to carry out additional measurements or structure refinements. However, the purpose of your study may justify the reported deviations and the more serious of these should normally be commented upon in the discussion or experimental section of a paper or in the "special\_details" fields of the CIF. checkCIF was carefully designed to identify outliers and unusual parameters, but every test has its limitations and alerts that are not important in a particular case may appear. Conversely, the absence of alerts does not guarantee there are no aspects of the results needing attention. It is up to the individual to critically assess their own results and, if necessary, seek expert advice.

### **Publication of your CIF in IUCr journals**

A basic structural check has been run on your CIF. These basic checks will be run on all CIFs submitted for publication in IUCr journals (*Acta Crystallographica*, *Journal of Applied Crystallography*, *Journal of Synchrotron Radiation*); however, if you intend to submit to *Acta Crystallographica Section C* or *E* or *IUCrData*, you should make sure that full publication checks are run on the final version of your CIF prior to submission.

### **Publication of your CIF in other journals**

Please refer to the *Notes for Authors* of the relevant journal for any special instructions relating to CIF submission.

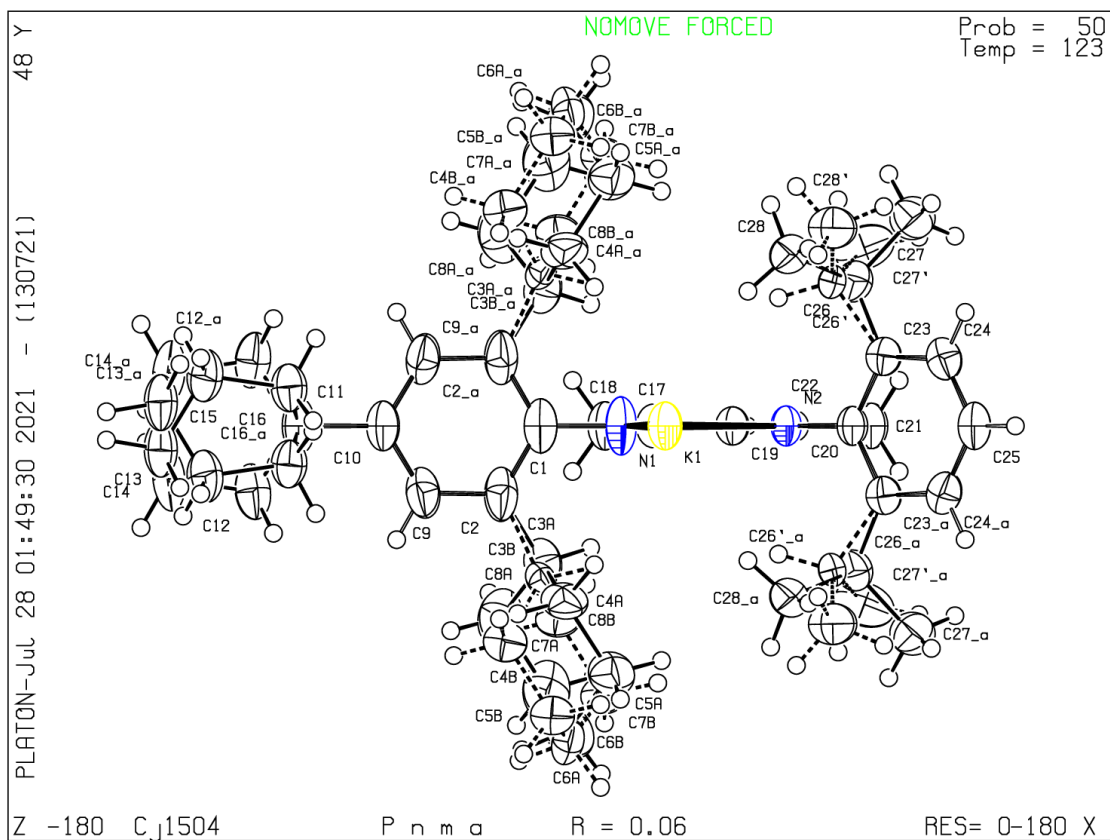

Supplement: s1 [file s1 › cmpd7 checkcif.pdf]
