# Supplementary material
Source: MDPI journal article supplement (https://www.mdpi.com/2304-6740/9/9/72)
Supplement: s1 [file s1]

Archive with 7 entries (7 files):
- cmpd2 checkcif.pdf
- cmpd3 checkcif.pdf
- cmpd4 checkcif.pdf
- cmpd5 checkcif.pdf
- cmpd6 checkcif.pdf
- cmpd7 checkcif.pdf
- TCHP group 1 SI.pdf
