# Supplementary material
Source: MDPI journal article supplement (https://www.mdpi.com/2304-6740/9/9/72)
Supplement: s1 [file s1 › TCHP group 1 SI.pdf]

# Synthesis and Characterization of Super Bulky $\beta$ -Diketiminato Group 1 Metal Complexes

Dafydd D. L. Jones,<sup>a</sup> Samuel Watts<sup>a</sup> and Cameron Jones<sup>\*,a</sup>

<sup>a</sup> School of Chemistry, PO Box 23, Monash University, VIC, 3800, Australia.

## Supplementary Information (9 pages)

|                 |                                                     |          |
|-----------------|-----------------------------------------------------|----------|
| <b>Contents</b> | <b>S1. Summary of crystallographic data for 2-7</b> | <b>2</b> |
|                 | <b>S2. NMR spectra for 2-7</b>                      | <b>3</b> |

# S1. Summary of crystallographic data for 2-7

**Table S1.** Summary of crystallographic data for 2-7.

|                                                     | <b>2</b>                                       | <b>3</b>                           | <b>4</b> ·(hexane) <sub>0.5</sub><br>(OEt <sub>2</sub> ) <sub>0.5</sub> | <b>5</b>                                           | <b>6</b>                                                        | <b>7</b>                                        |
|-----------------------------------------------------|------------------------------------------------|------------------------------------|-------------------------------------------------------------------------|----------------------------------------------------|-----------------------------------------------------------------|-------------------------------------------------|
| empirical formula                                   | C <sub>41</sub> H <sub>60</sub> N <sub>2</sub> | C <sub>29</sub> H <sub>43</sub> NO | C <sub>62</sub> H <sub>99</sub> LiN <sub>2</sub> O <sub>1.5</sub>       | C <sub>45</sub> H <sub>69</sub> LiN <sub>2</sub> O | C <sub>106</sub> H <sub>154</sub> K <sub>2</sub> N <sub>4</sub> | C <sub>41</sub> H <sub>59</sub> KN <sub>2</sub> |
| formula weight                                      | 580.91                                         | 421.64                             | 903.37                                                                  | 660.96                                             | 1562.52                                                         | 619.00                                          |
| crystal system                                      | monoclinic                                     | triclinic                          | monoclinic                                                              | triclinic                                          | monoclinic                                                      | orthorhombic                                    |
| space group                                         | <i>P</i> 2 <sub>1</sub> / <i>c</i>             | <i>P</i> -1                        | <i>P</i> 2 <sub>1</sub> / <i>n</i>                                      | <i>P</i> -1                                        | <i>P</i> 2 <sub>1</sub> / <i>n</i>                              | <i>Pnma</i>                                     |
| <i>a</i> (Å)                                        | 15.0415(2)                                     | 10.75380(10)                       | 10.31590(10)                                                            | 15.8715(2)                                         | 14.0249(5)                                                      | 11.8341(10)                                     |
| <i>b</i> (Å)                                        | 10.7081(2)                                     | 15.3298(2)                         | 19.3423(2)                                                              | 17.0248(3)                                         | 17.4283(4)                                                      | 16.6685(19)                                     |
| <i>c</i> (Å)                                        | 22.1277(2)                                     | 15.9068(2)                         | 28.3898(2)                                                              | 18.3141(4)                                         | 19.1994(7)                                                      | 18.3950(15)                                     |
| $\alpha$ (deg.)                                     | 90                                             | 85.3680(10)                        | 90                                                                      | 117.557(2)                                         | 90                                                              | 90                                              |
| $\beta$ (deg)                                       | 93.373(1)                                      | 74.0270(10)                        | 99.0910(10)                                                             | 104.449(2)                                         | 103.306(4)                                                      | 90                                              |
| $\gamma$ (deg.)                                     | 90                                             | 84.4420(10)                        | 90                                                                      | 98.068(2)                                          | 90                                                              | 90                                              |
| vol (Å <sup>3</sup> )                               | 3557.84(9)                                     | 2505.18(5)                         | 5593.55(9)                                                              | 4055.50(15)                                        | 4566.9(3)                                                       | 3628.5(6)                                       |
| <i>Z</i>                                            | 4                                              | 4                                  | 4                                                                       | 4                                                  | 2                                                               | 4                                               |
| $\rho$ (calcd)<br>(g.cm <sup>-3</sup> )             | 1.084                                          | 1.118                              | 1.073                                                                   | 1.083                                              | 1.136                                                           | 1.133                                           |
| $\mu$ (mm <sup>-1</sup> )                           | 0.458                                          | 0.497                              | 0.461                                                                   | 0.468                                              | 1.275                                                           | 1.485                                           |
| <i>F</i> (000)                                      | 1280                                           | 928                                | 2000                                                                    | 1456                                               | 1712                                                            | 1352                                            |
| reflections collected                               | 26373                                          | 48933                              | 40419                                                                   | 76675                                              | 38794                                                           | 16307                                           |
| unique reflections                                  | 6598                                           | 9104                               | 10265                                                                   | 15037                                              | 8295                                                            | 3489                                            |
| <i>R</i> <sub>int</sub>                             | 0.0661                                         | 0.0313                             | 0.0795                                                                  | 0.0614                                             | 0.1989                                                          | 0.0704                                          |
| R1 indices<br>[ <i>I</i> > 2 $\sigma$ ( <i>I</i> )] | 0.0559                                         | 0.0745                             | 0.0775                                                                  | 0.0618                                             | 0.0991                                                          | 0.0638                                          |
| wR2 indices<br>(all data)                           | 0.1563                                         | 0.2185                             | 0.2296                                                                  | 0.1668                                             | 0.2918                                                          | 0.1731                                          |
| largest peak/hole<br>(e/Å <sup>3</sup> )            | 0.387, -0.307                                  | 0.739, -0.350                      | 0.913, -0.536                                                           | 0.349, -0.278                                      | 0.629, -1.197                                                   | 0.249, -0.370                                   |
| CCDC No.                                            | 2105059                                        | 2105062                            | 2105061                                                                 | 2105064                                            | 2105060                                                         | 2105063                                         |

## S2. NMR spectra of 2-7

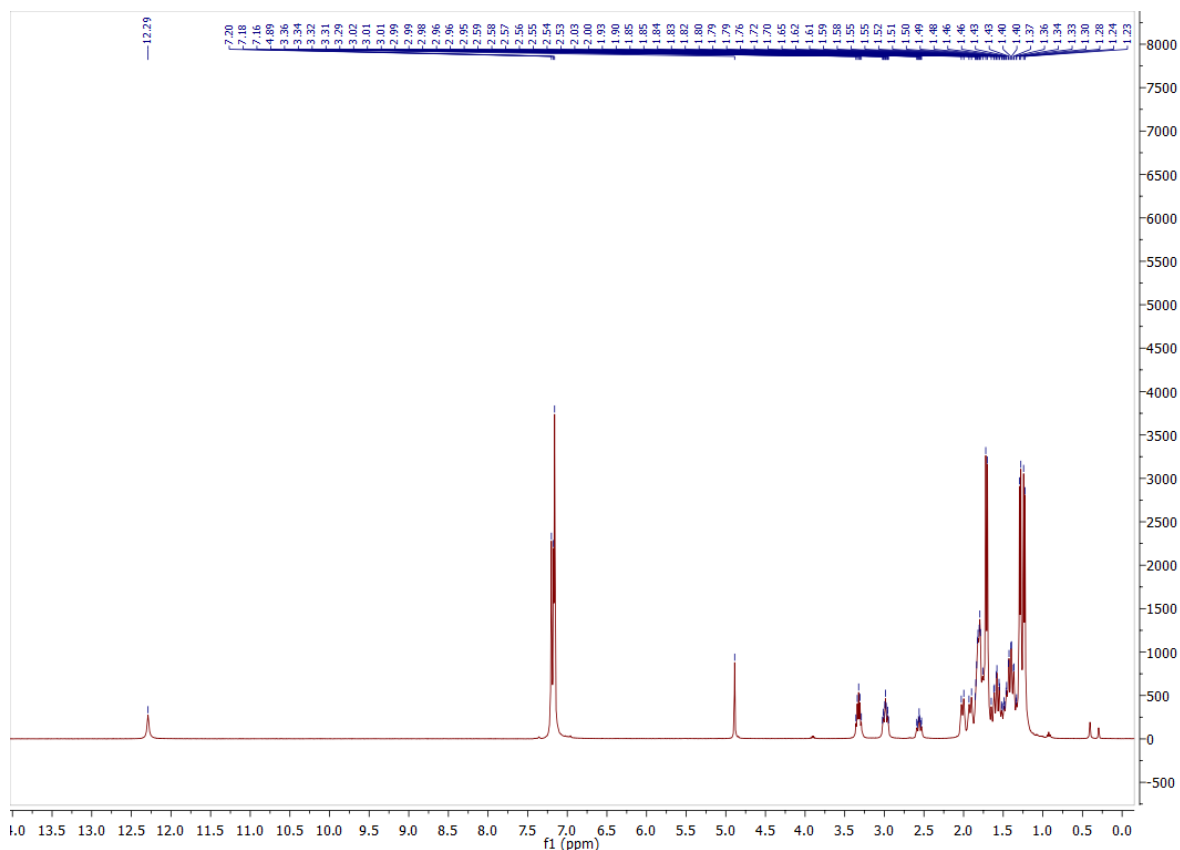

**Figure S1.** <sup>1</sup>H NMR spectrum (400 MHz, 298 K, C<sub>6</sub>D<sub>6</sub>) of **2**.

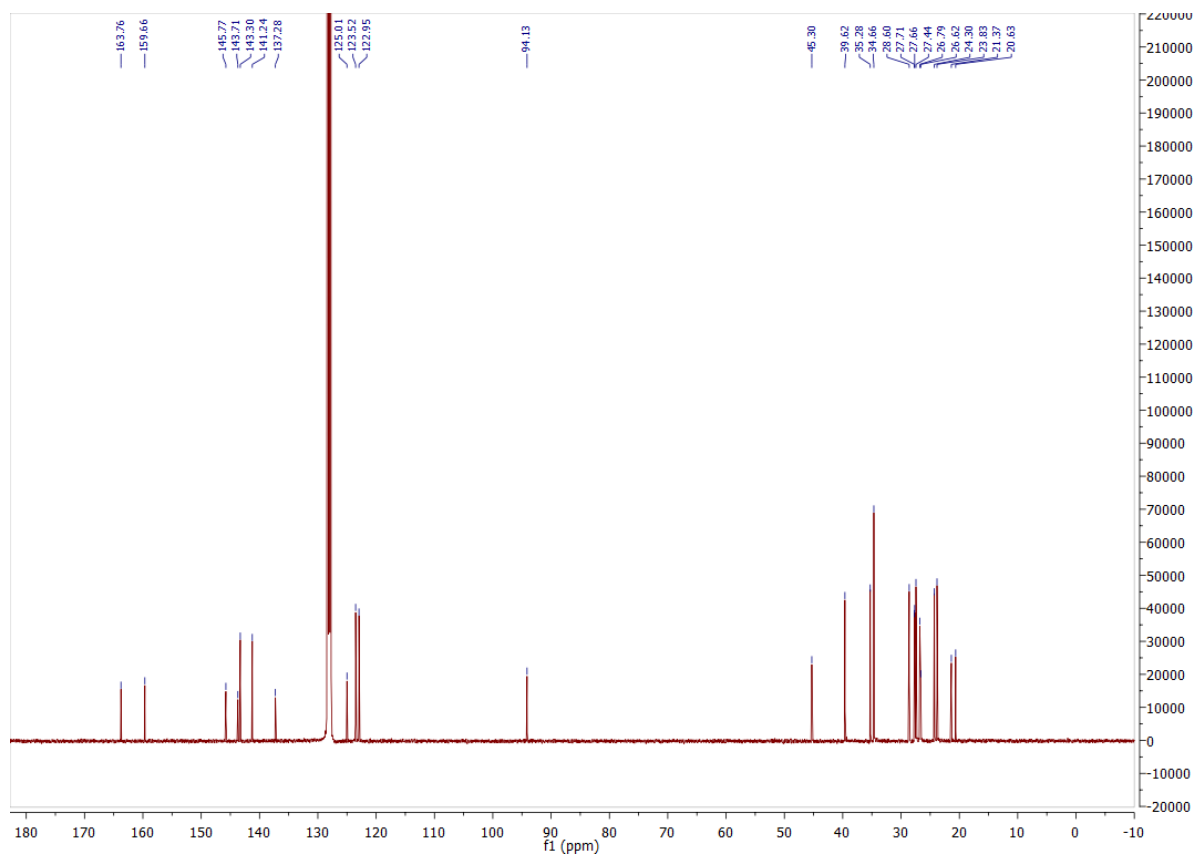

**Figure S2.** <sup>13</sup>C{<sup>1</sup>H} NMR spectrum (101 MHz, 298 K, C<sub>6</sub>D<sub>6</sub>) of **2**.

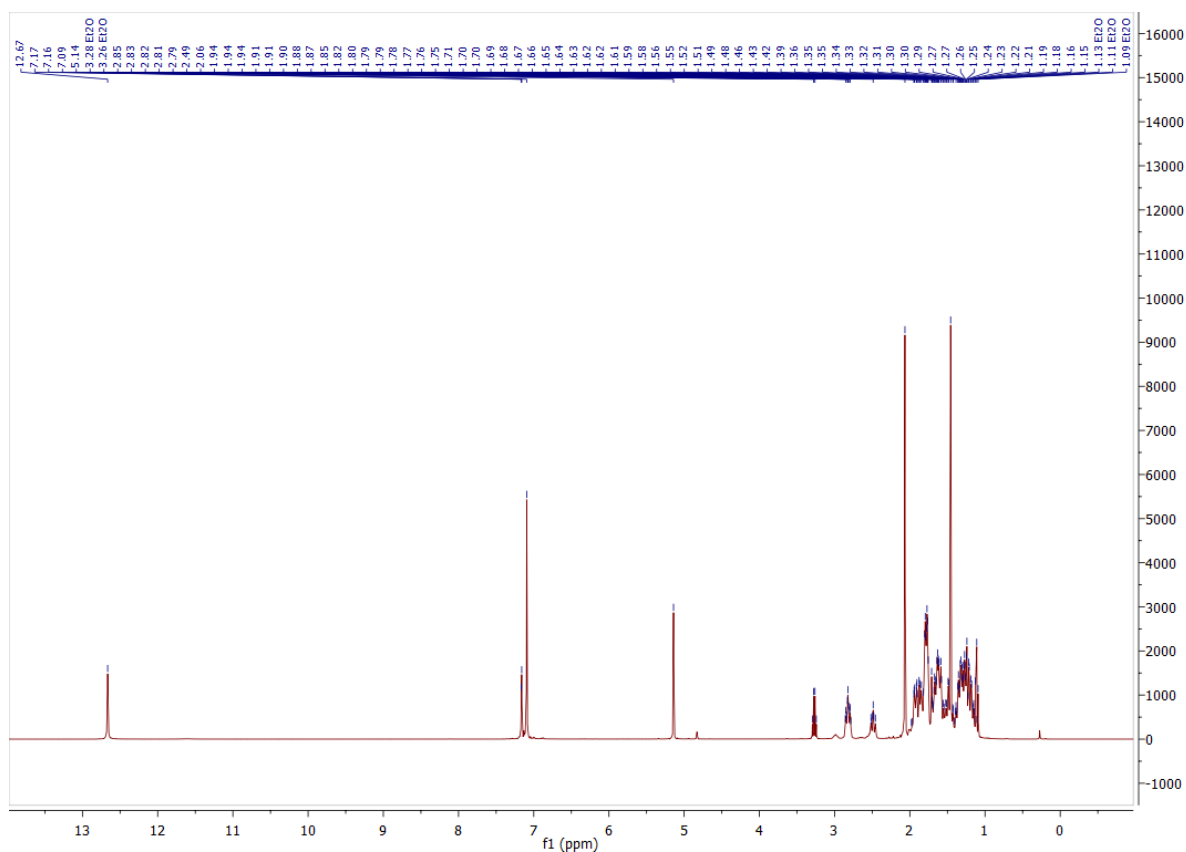

**Figure S3.** <sup>1</sup>H NMR spectrum (400 MHz, 298 K, C<sub>6</sub>D<sub>6</sub>) of **3**.

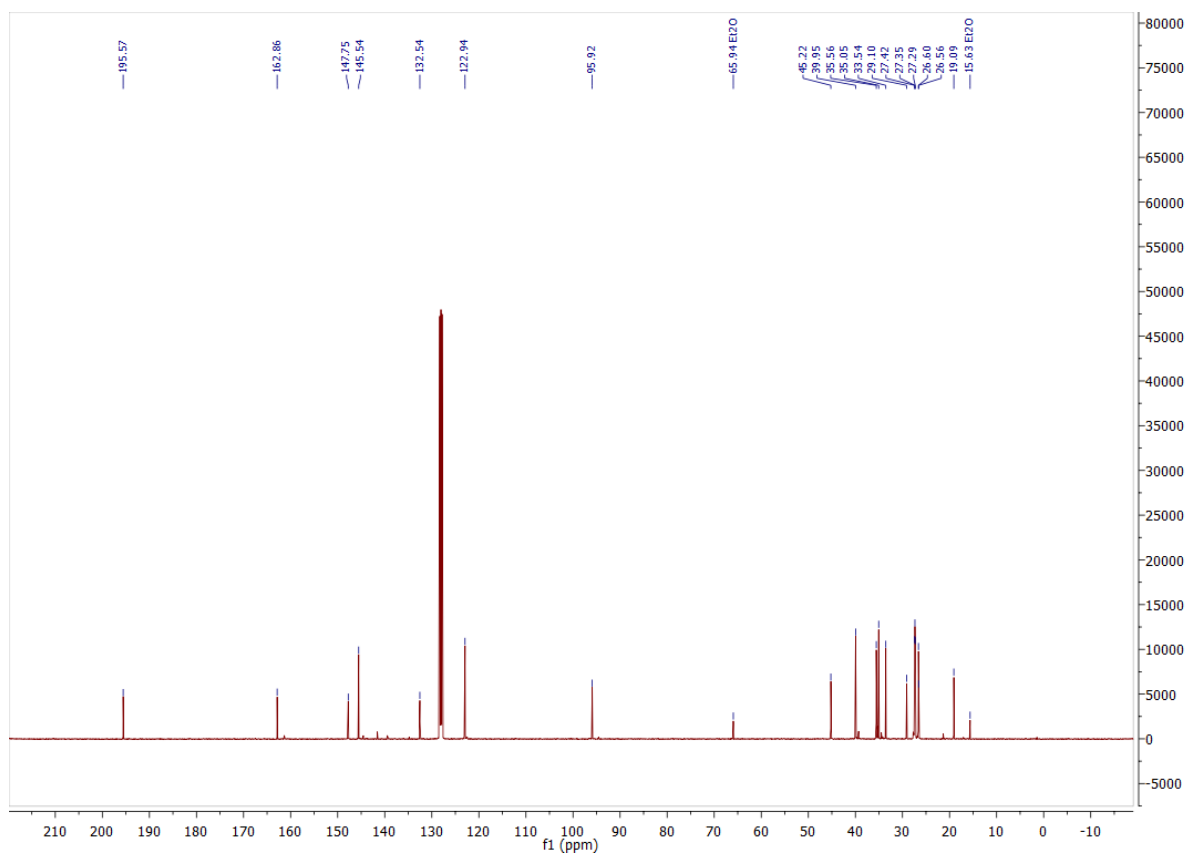

**Figure S4.** <sup>13</sup>C{<sup>1</sup>H} NMR spectrum (101 MHz, 298 K, C<sub>6</sub>D<sub>6</sub>) of **3**.

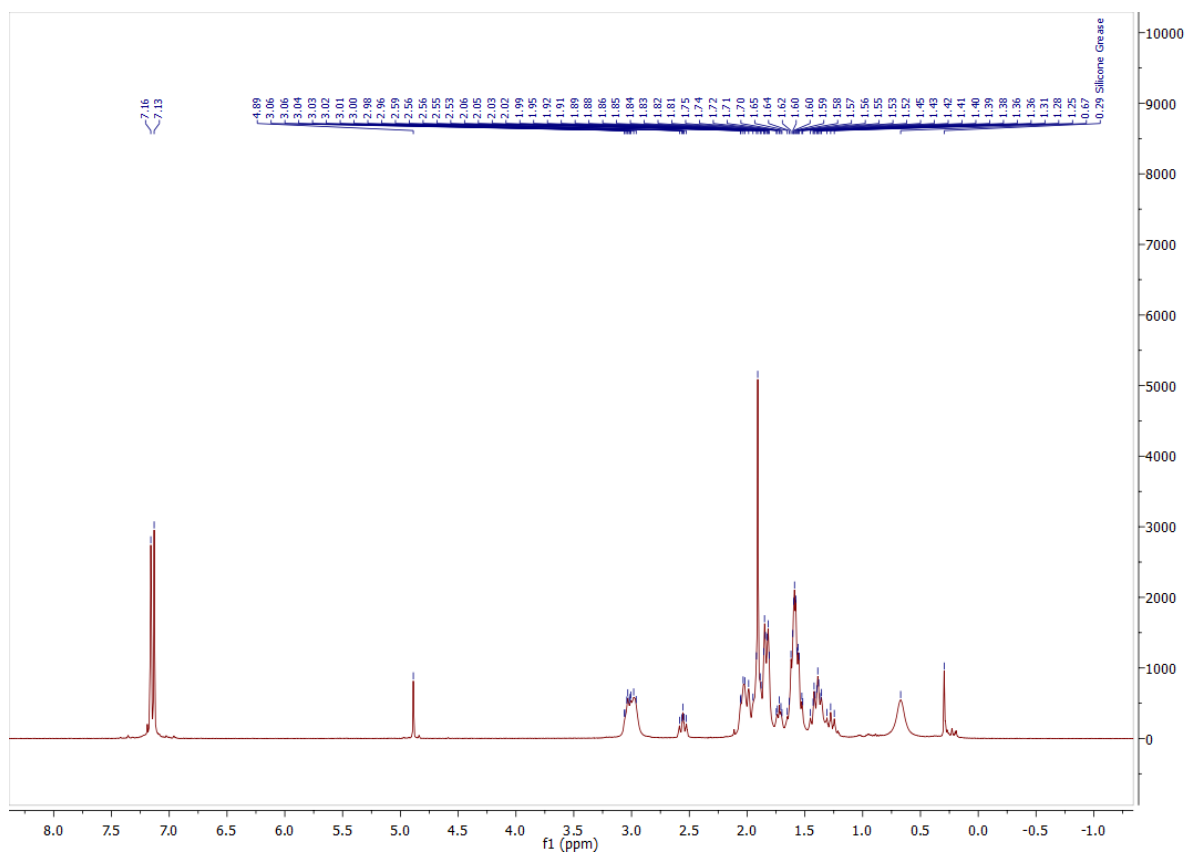

Figure S5. <sup>1</sup>H NMR spectrum (400 MHz, 298 K, C<sub>6</sub>D<sub>6</sub>) of 4.

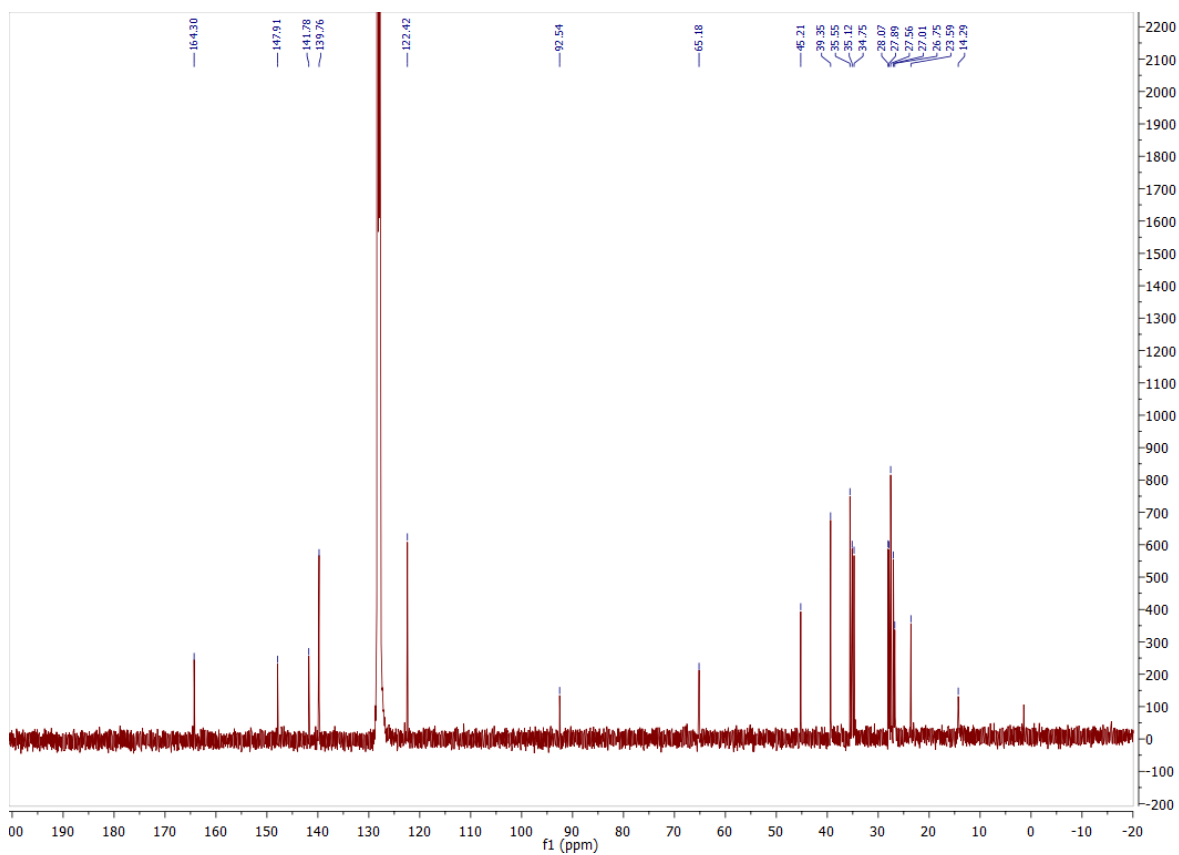

Figure S6. <sup>13</sup>C{<sup>1</sup>H} NMR spectrum (101 MHz, 298 K, C<sub>6</sub>D<sub>6</sub>) of 4.

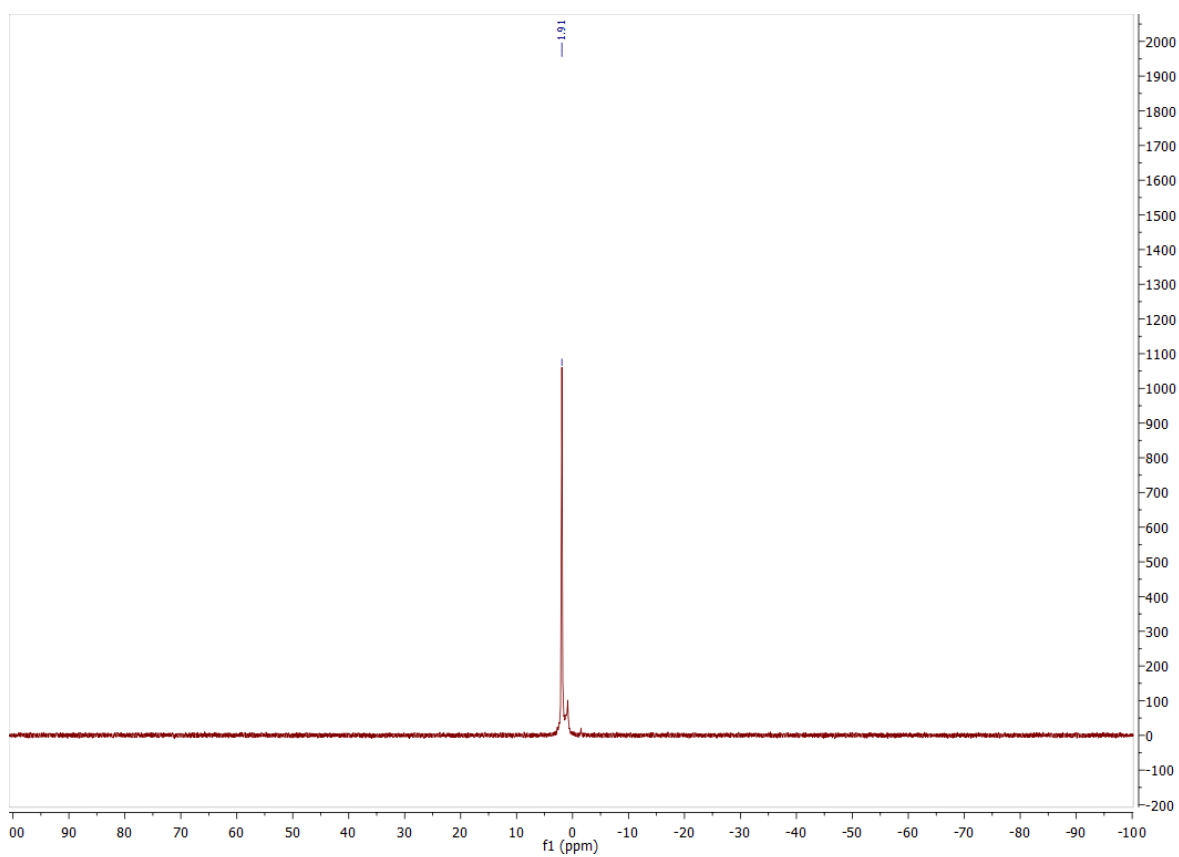

**Figure S7.**  ${}^7\text{Li}\{ {}^1\text{H} \}$  NMR spectrum (155 MHz, 298 K,  $\text{C}_6\text{D}_6$ ) of **4**.

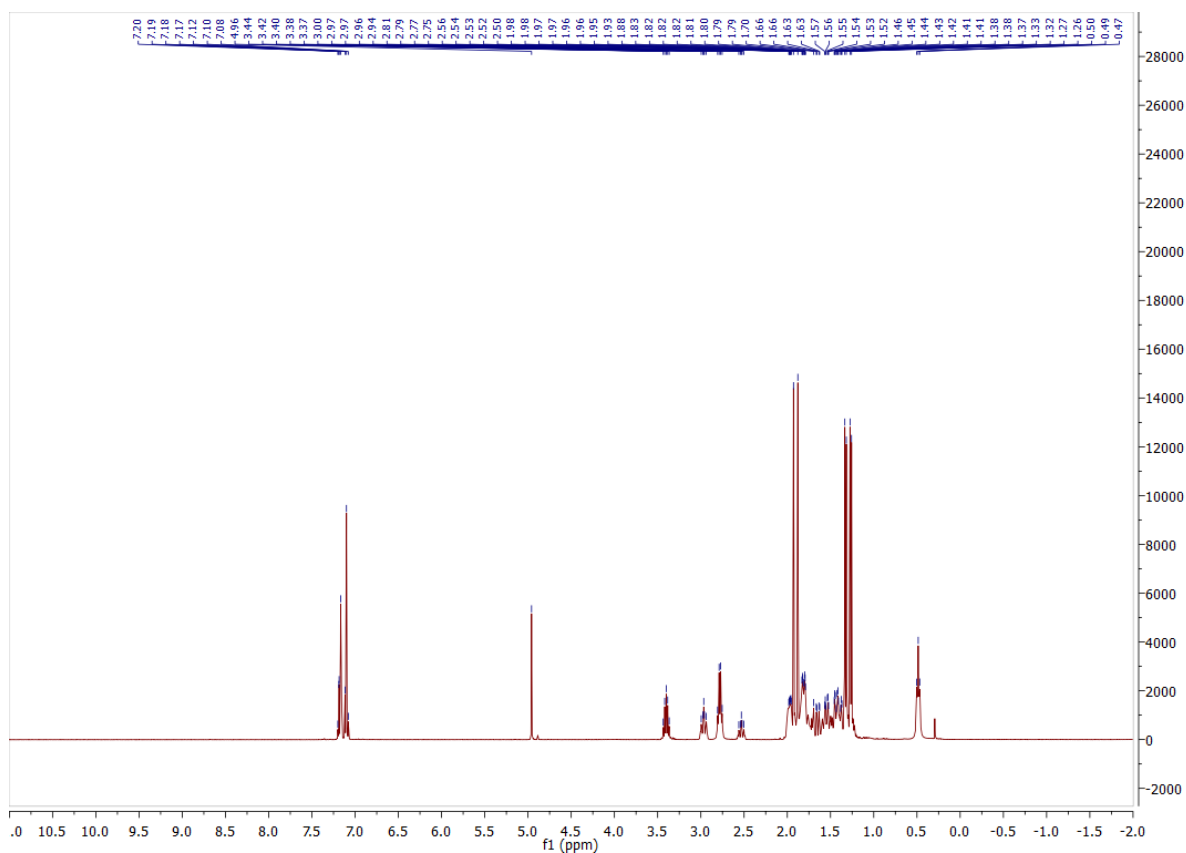

**Figure S8.**  ${}^1\text{H}$  NMR spectrum (400 MHz, 298 K,  $\text{C}_6\text{D}_6$ ) of **5**.

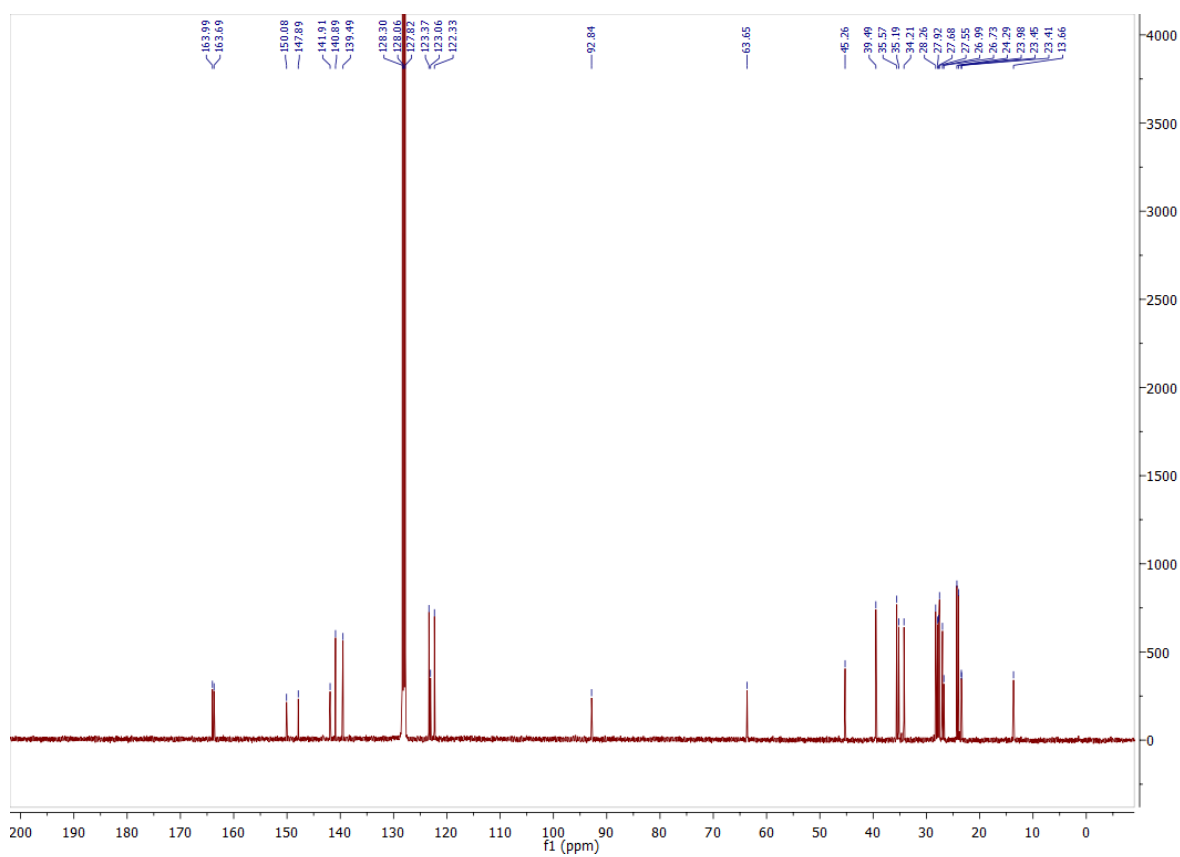

**Figure S9.**  $^{13}\text{C}\{^1\text{H}\}$  NMR spectrum (101 MHz, 298 K,  $\text{C}_6\text{D}_6$ ) of **5**.

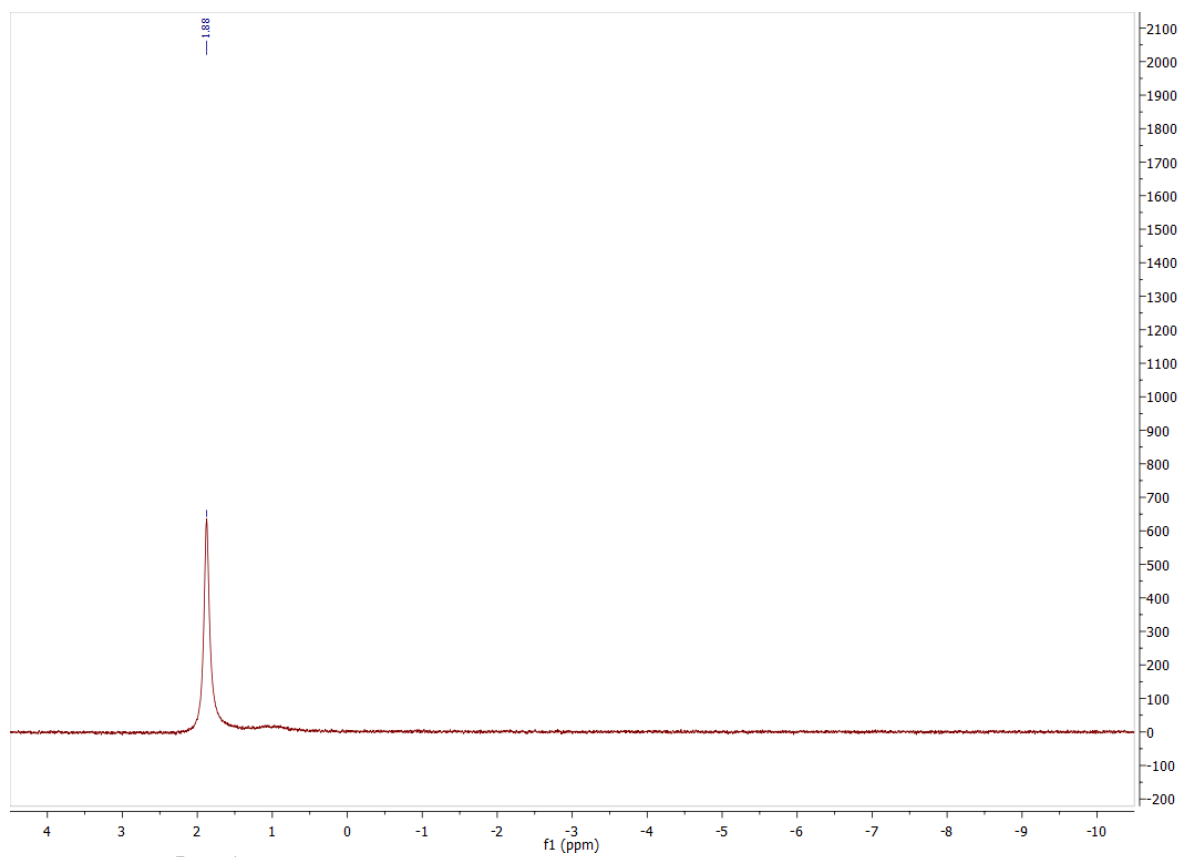

**Figure S10.**  $^7\text{Li}\{^1\text{H}\}$  NMR spectrum (155 MHz, 298 K,  $\text{C}_6\text{D}_6$ ) of **5**.

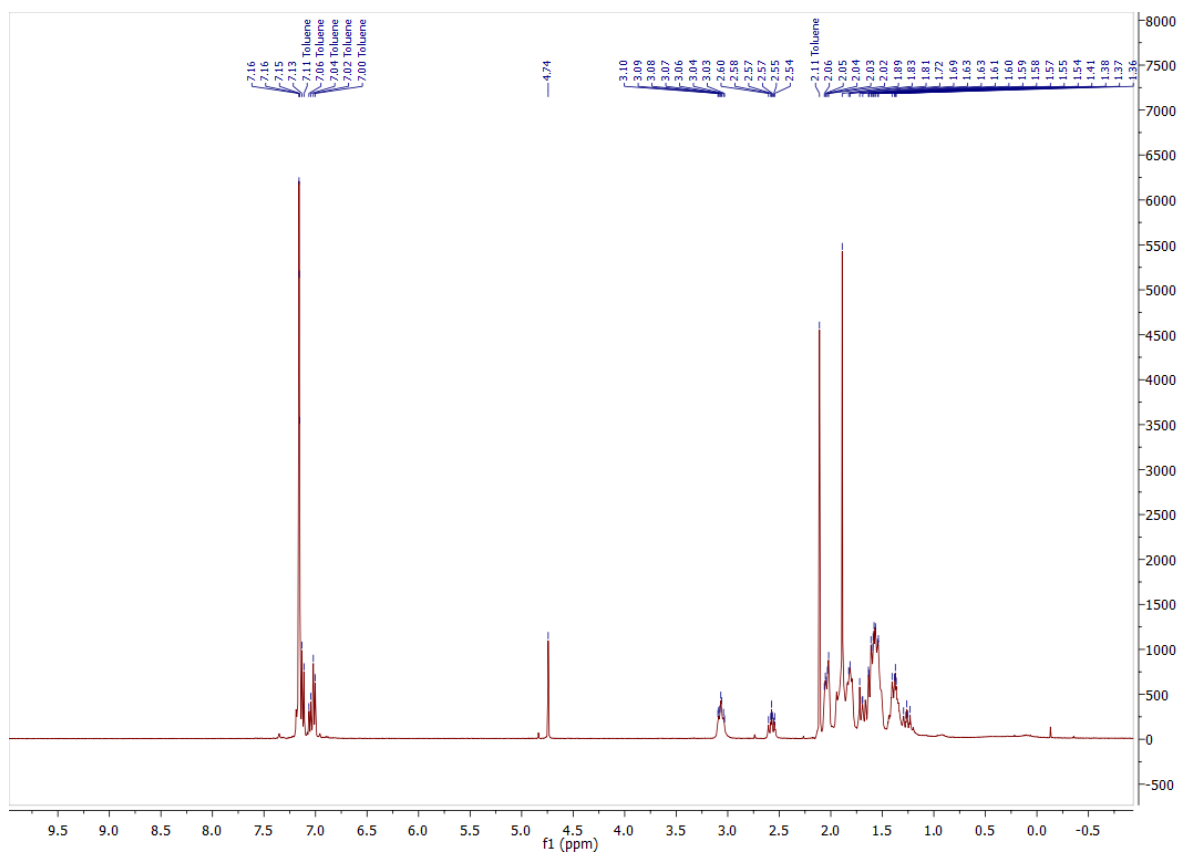

**Figure S11.** <sup>1</sup>H NMR spectrum (400 MHz, 298 K, C<sub>6</sub>D<sub>6</sub>) of **6**.

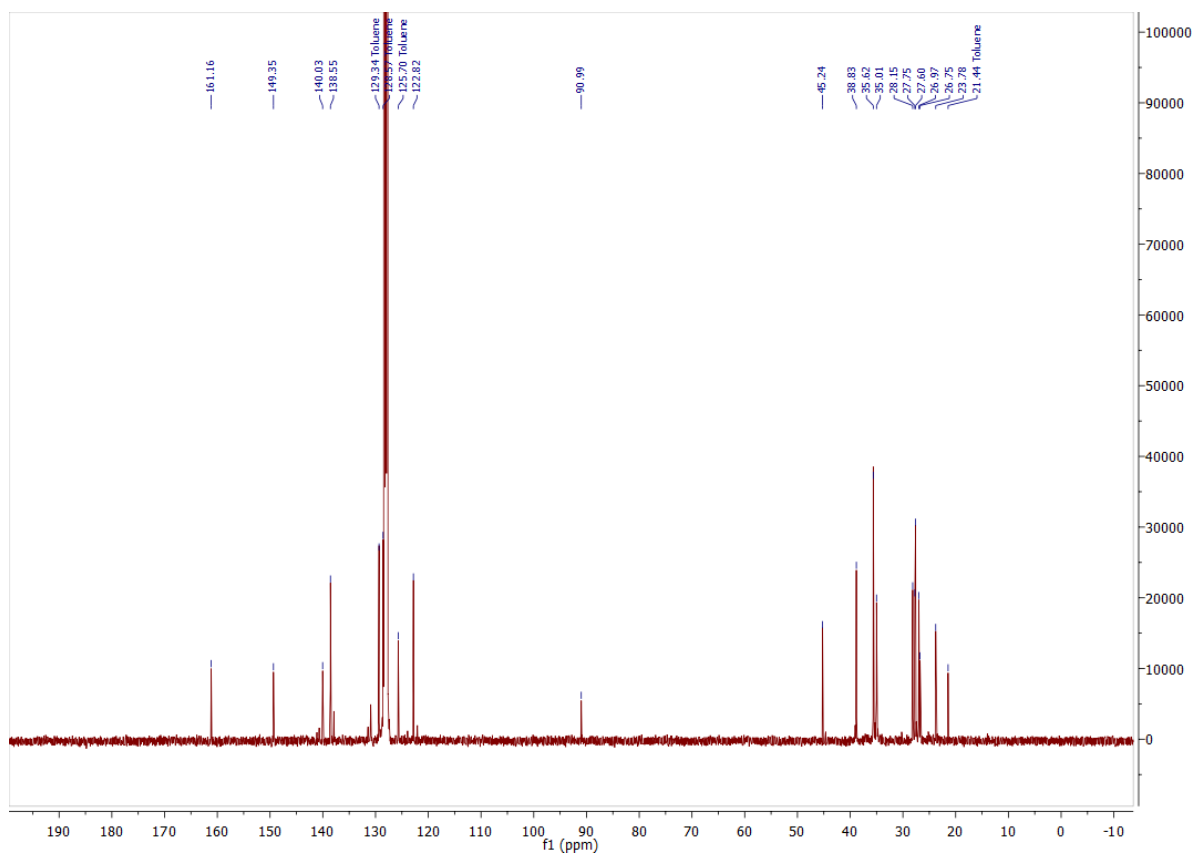

**Figure S12.** <sup>13</sup>C{<sup>1</sup>H} NMR spectrum (101 MHz, 298 K, C<sub>6</sub>D<sub>6</sub>) of **6**.

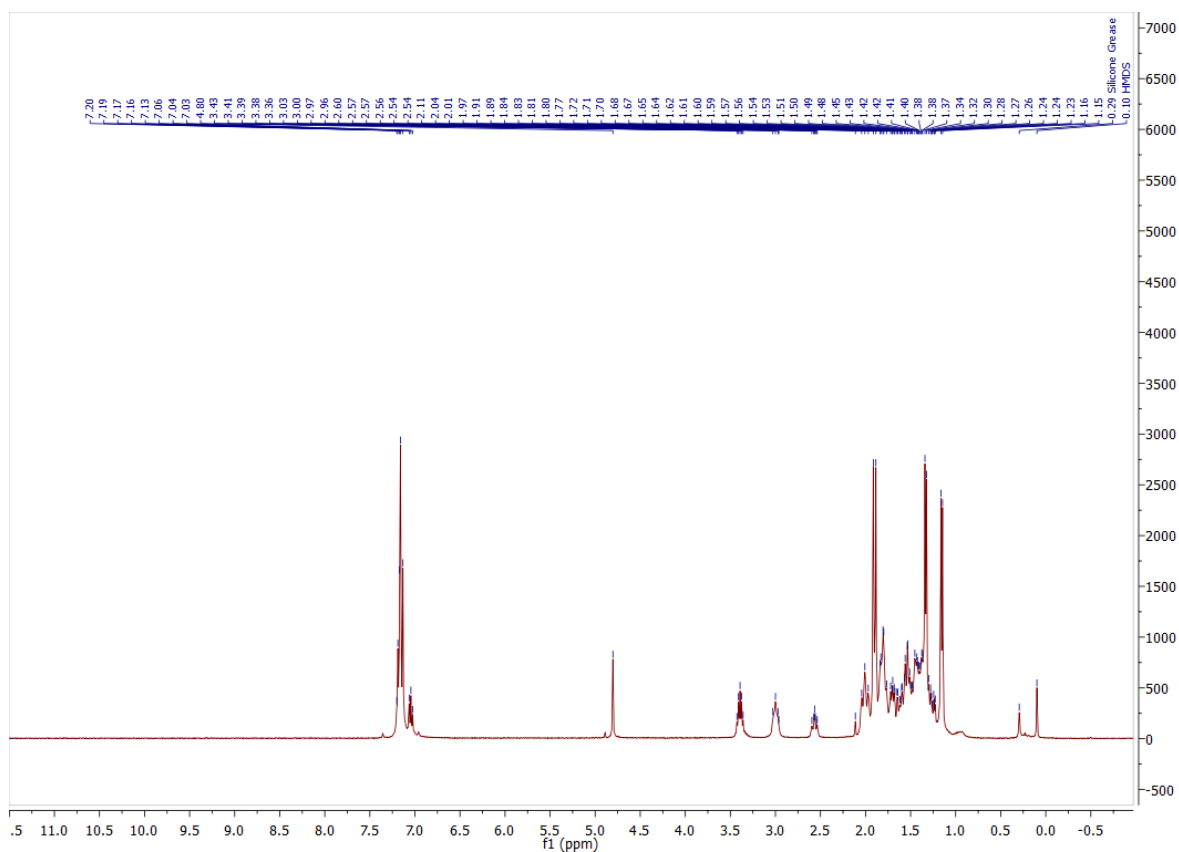

**Figure S13.**  $^1\text{H}$  NMR spectrum (400 MHz, 298 K,  $\text{C}_6\text{D}_6$ ) of **7**.

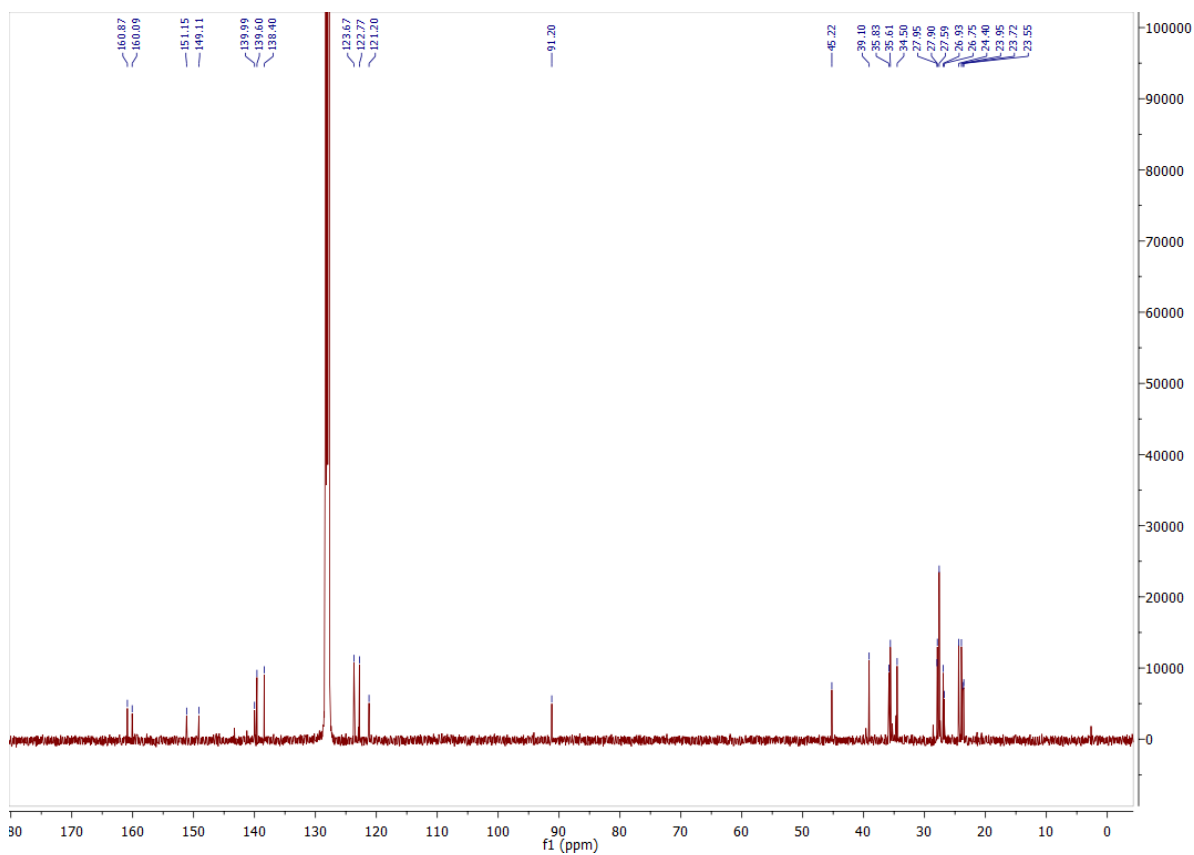

**Figure S14.**  $^{13}\text{C}\{^1\text{H}\}$  NMR spectrum (101 MHz, 298 K,  $\text{C}_6\text{D}_6$ ) of **7**.
